# Supplementary material
Source: Springer Nature journal article supplement (https://www.springermedizin.de/resource/supplementary/12967_2008_285_MOESM1_ESM.pdf/9576108)

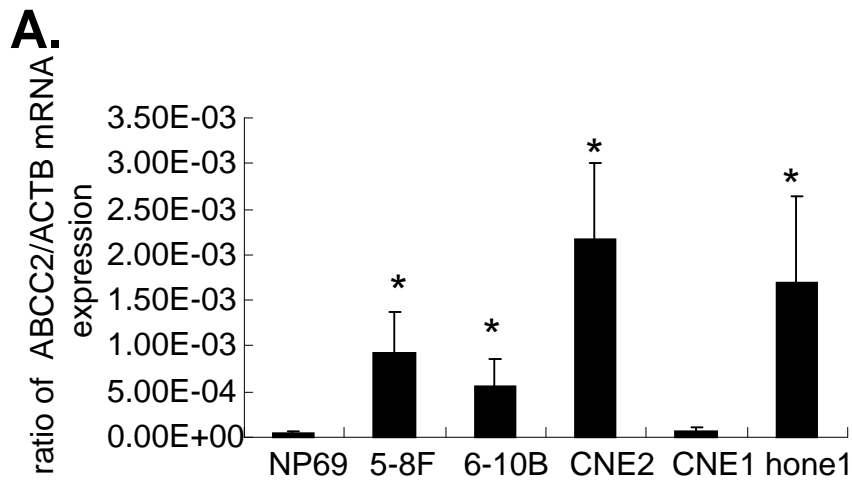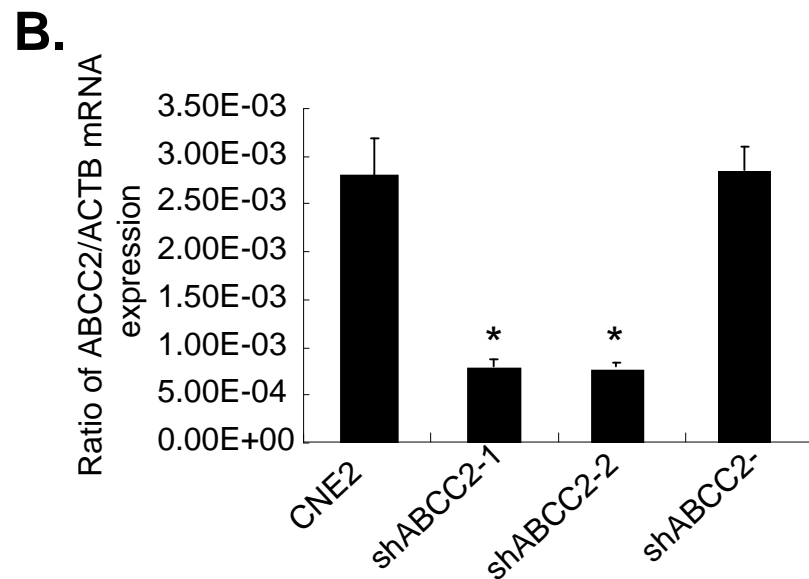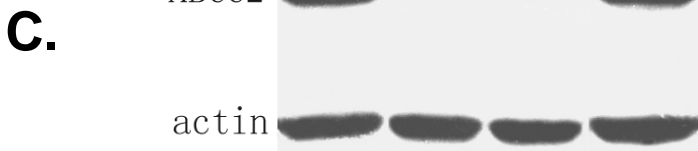

1:CNE2 2:shABCC2-1 3: shABCC2-2 4 shABCC2-

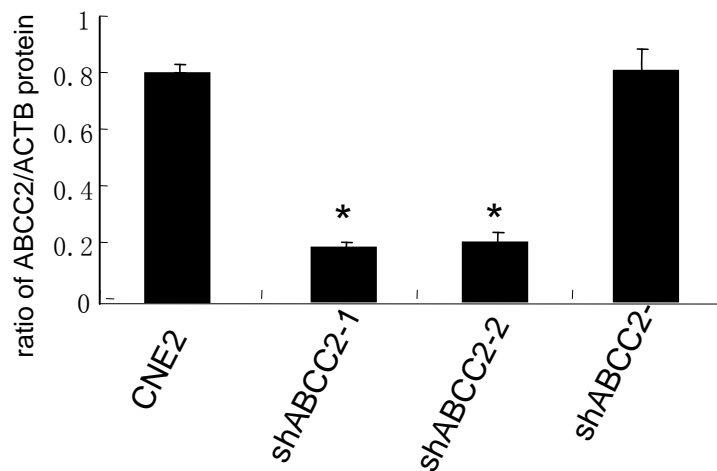

Supplement: MOESM1 [file 9576108]
